# Supplementary material for: A cyber-linked undergraduate research experience in computational biomolecular structure prediction and design
Source: PubMed Central journal article supplement (PMC5720517; doi:10.1371/journal.pcbi.1005837), 2017-12-07
Supplement: pcbi.1005837.s001.pdf [file pcbi.1005837.s001.pdf]

# Supporting Information

## **“A cyber-linked undergraduate research experience in biomolecular structure prediction and design”**

Rebecca F. Alford, Andrew Leaver-Fay, Lynda Gonzales, Erin L. Dolan, Jeffrey J. Gray

|                                                 |          |
|-------------------------------------------------|----------|
| <b>Student selection criteria</b>               | <b>2</b> |
| <b>Rosetta Boot Camp Learning objectives</b>    | <b>3</b> |
| <b>Selected responses from student survey</b>   | <b>6</b> |
| <i>Comments about the research community</i>    | 6        |
| <i>Regarding program outcomes</i>               | 6        |
| <b>Contact information for program director</b> | <b>7</b> |

## Student selection criteria

Student applications were evaluated using the following criteria. Specifically, we ranked each application on a scale of one to five, with:

- 1 = Stellar, must-have student
- 2 = Super, student would be good for the program
- 3 = Acceptable for the program
- 4 = Likely not a good match
- 5 = Not a good match

**Table S1. Student selection criteria**

| <b>Criteria</b>                            | <b>Description</b>                                                                                                                       |
|--------------------------------------------|------------------------------------------------------------------------------------------------------------------------------------------|
| Potential for graduate school              | The student has demonstrated an interest in graduate school in their essay                                                               |
| Potential for scientific research          | The student has previous experience working on a scientific research project in an academic or industry lab                              |
| Potential in computer programming          | The student has previous experience or has taken one or more courses in computer programming                                             |
| Potential in biophysics and biochemistry   | The student has previous experience or has taken one or more courses in biophysics and/or biochemistry                                   |
| Motivation                                 | In the essay, the student has demonstrated interest and enthusiasm for the field of computational biology and biophysics                 |
| Strength of recommendations                | Letters of recommendation indicate the student is motivated to learn and has the potential to succeed in a research lab                  |
| GPA and transcript                         | Transcript demonstrates strong academic performance in relevant courses                                                                  |
| Match quality to an open project           | The students' prior experience and skills are well matched to an available project. The student also indicated interest in that project. |
| Contribution to diversifying our community | The student is part of a group traditionally underrepresented in science and engineering.                                                |

## Rosetta Boot Camp Learning objectives

Here we list learning objectives for Rosetta Boot Camp: a one-week workshop designed to orient students to software engineering and biomolecular modeling in Rosetta. The objectives are organized into three categories: (1) development of translational software engineering skills, (2) navigation of the Rosetta 3 software suite and (3) creation of new methods using the Rosetta 3 libraries.

1. Develop translational software engineering skills
  - a. Interact with a computer using the Linux/Unix command line
    - i. Open files from the command line
    - ii. Navigate directory hierarchies with `cd`
    - iii. Search for code using `ack (ack-grep)`
  - b. Write unit tests using the CxxTest suite
    - i. Describe the purpose of a unit test
    - ii. Define code correctness
    - iii. Develop code that is 100% testable (a “test first” strategy)
    - iv. Add, compile, and run a new unit test suite for new code
    - v. Add a new unit test to an existing suite
    - vi. Write comprehensive tests for a small class
  - c. Manage software development using Git and GitHub for version control
    - i. Summarize the benefits of version control
    - ii. Create and manage branches
    - iii. Stage files for commits
    - iv. Commit changes to a repository
    - v. Merge and update branches
    - vi. Resolve conflicts that arise upon merging branches
    - vii. Identify a reference for learning advanced Git commands as needed
  - d. Write object-oriented C++ programs
    - i. Write a method in C++
    - ii. Write an overloaded method in C++
    - iii. Write a class in C++
    - iv. Apply C++ specific keywords: `const`, `this`, `static`
    - v. Explain the benefits and limitations of smart pointers
  - e. Gain familiarity with object-oriented programming
    - i. Define and summarize the benefits of object-oriented programming
    - ii. Recognize frequently used “design patterns” employed in Rosetta: Factory method, Abstract factory, Singleton, Command, Curiously recurring template pattern
    - iii. Recognize when encapsulation (private data members) is necessary and why
    - iv. Recognize the value provided by virtual functions
2. Navigate the Rosetta 3 object-oriented software suite
  - a. Find and interpret Rosetta C++ code
    - i. Recognize the location of code given the namespace/directory convention
    - ii. Identify documentation for classes and methods from header files
    - iii. Identify method details from source files

- b. Use key resources for collaborating on Rosetta development
    - i. Access and ask questions on the Slack channel
    - ii. Access and ask questions on the Rosetta developer email list
    - iii. Access and ask questions on the Rosetta forums
  - c. Know the purpose of frequently used Rosetta protocols
    - i. *ab initio* protein structure prediction via fragment insertion
    - ii. Protein design via the `pack_rotamers` module
    - iii. High-resolution structure refinement with the `relax` protocol
    - iv. Docking as a combination low-res / high-res protocol
    - v. Active-site grafting with 6D hashing in the `Matcher`
    - vi. Loop-grafting with 6D hashing in `LoopHash`
    - vii. Coarse backbone “designability” score using 6D hashing in `MotifHash`
  - d. Know the data and methods associated with frequently used classes
    - i. Describe key methods in a `Mover` class
    - ii. Describe key methods in a `Filter` class
    - iii. Describe key methods in a `ScoreFunction` class
  - e. Watch conformational sampling in real time using `PyMOL` and the `PyMOLObserver`
  - f. Describe conformational sampling strategies using internal geometry
    - i. Define downstream coordinate change propagation. List benefits and drawbacks.
    - ii. Describe common sampling strategies used by Rosetta:
      - 1. Control side chain conformations with the `packer`
      - 2. Control backbone conformations with `set_phi` and `set_psi`
      - 3. Control backbone conformations with the `FoldTree`
      - 4. Close loops using the CCD loop closure algorithm
3. Create new methods in the Rosetta 3 libraries
- a. Use `scons` to compile existing and new files
    - i. Add new files for compilation by editing a `src/*.src.settings` file
    - ii. Add new unit tests for compilation by editing a `test/*.src.settings` file
    - iii. Compile libraries and applications in debug and release mode
    - iv. Compile the unit test suites
    - v. Create fast recompilation scripts by copying output from `scons`
  - b. Automate structure-processing pipelines using `bash`, `awk`, and `sed`
  - c. Write a basic Rosetta protocol in C++
  - d. Write an application that minimizes downstream coordinate propagation using a custom-built `FoldTree`
  - e. Write a Rosetta Script to combine existing modules into a new protocol
    - i. List benefits of Rosetta’s XML interface
    - ii. Edit XML files into a Rosetta-scripts-valid format
    - iii. Interpret and address schema-validation failures
    - iv. Use the schema to list parameters for `Movers/Filters/etc`
    - v. Iteratively improve a Rosetta Script to expand its functionality
  - f. Know the steps for contributing code to the master version of Rosetta
    - i. Describe the importance of coding conventions
    - ii. Write code that adheres to community coding conventions
    - iii. Write and add an integration test for a new application
    - iv. Create a pull request using the GitHub interface
    - v. Merge a pull request using the GitHub interface

- vi. Write user-facing documentation on the Rosetta Gollum wiki
- vii. Write in-code documentation using Doxygen tags
- viii. Use the benchmark server to run integration and unit tests on a development branch

## Selected responses from student survey

### *Comments about the research community*

- “When the interns joined up again at the conference it was like no time had passed”
- “The networking opportunity I had was invaluable. I know contacts all across the country I can go to for advice, and even a letter of recommendation. The fact that I was treated like a graduate student and given essentially free-reign on the project vastly improved my confidence in conducting scientific research”
- “One of the highlights of my experience was how close-knit I became with the other graduate students in the lab”
- “Science I’m the first in my family to go to graduate school, it was really helpful to get to know the faculty mentor and graduate student assistant.”
- “Rosetta was developed by a lot of different labs and there are constantly new things being added, so there has to be some way of managing that process. I learned how a large team can contribute and all maintain the same code base”

### *Regarding program outcomes*

- “I feel more confident in my ability to be more independent in my projects”
- “The research experience helped me learn about my own research and work style, and the improvements I need to make to my work ethic. It really clarified for me what a graduate school experience would look like, and showed me that I really would enjoy doing that. Because of this program I have a renewed motivation to participate in graduate school”
- “I learned so much about graduate school and the process of research from all members of the lab, not just my mentor”
- “It has taught me about the process of applying to graduate school and has really enforced my goals to pursue a PhD”
- “I was introduced to a new side of computational biology/bioinformatics, which I am interested in pursuing further as a possible career field”
- “This summer really solidified my resolve to become a scientist”
- “Before the experience I wasn’t confident about graduate school because I didn’t know what kind of degree I wanted. Now, I’m applying for graduate programs related to computational biology or biomedical informatics which I really enjoyed learning about over the summer”

## Contact information for program director

Below is the contact information for the program director and coordinator:

Jeffrey J Gray  
Program Director  
Professor, Chemical & Biomolecular Engineering  
Johns Hopkins University  
Phone: 1-410-516-3313  
Email: [jgray@jhu.edu](mailto:jgray@jhu.edu)

Camille Mathis  
Program Coordinator  
Director of Academic Programs, Institute for Nano Biotechnology  
Johns Hopkins University  
Phone: 1-41-0516-6572  
Email: [cmathis@jhu.edu](mailto:cmathis@jhu.edu)
